# Supplementary material for: MOBFinder: a tool for mobilization typing of plasmid metagenomic fragments based on a language model
Source: PubMed Central journal article supplement (PMC11299106; doi:10.1093/gigascience/giae047), 2024-08-05
Supplement: giae047_response_to_reviewer_comments_original_submission.pdf [file giae047_response_to_reviewer_comments_original_submission.pdf]

## **Author's Response To Reviewer Comments**

The response to specific reviewer and editor comments has been uploaded in the cover letter.
